# Supplementary material for: The on-line coupled atmospheric chemistry model system MECO(n) – Part 5: Expanding the Multi-Model-Driver (MMD v2.0) for 2-way data exchange including data interpolation via GRID (v1.0)
Source: Copernicus journal article supplement (doi:10.5194/gmd-11-1059-2018), 2018-03-16
Supplement: Supplementary file 2 [file gmd-11-1059-2018-supplement.zip]

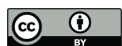

## *Supplement of*

# **The on-line coupled atmospheric chemistry model system MECO(n) – Part 5: Expanding the Multi-Model-Driver (MMD v2.0) for 2-way data exchange including data interpolation via GRID (v1.0)**

**Astrid Kerkweg et al.**

*Correspondence to:* Astrid Kerkweg (kerkweg@uni-bonn.de)

- [gmd-11-1059-2018-supplement-title-page.pdf](#)
- [GRID-user-manual\\_v1.0.pdf](#)
- [MMDv2-user-manual.pdf](#)
- [MMDv2.0-library-manual.pdf](#)
- [SupplementalMaterial.pdf](#)

The copyright of individual parts of the supplement might differ from the CC BY 3.0 License.
